# Supplementary material
Source: PubMed Central journal article supplement (PMC9218928)
Supplement: jamacardiol-e221651-s002.pdf [file jamacardiol-e221651-s002.pdf]

## Supplementary Online Content

Ennis S, Lobley G, Worrall S, et al. Effectiveness and safety of early initiation of poststernotomy cardiac rehabilitation exercise training: the SCAR randomized clinical trial. *JAMA Cardiol*. Published online June 22, 2022.  
doi:10.1001/jamacardio.2022.1651

**eTable 1.** Demographic and Clinical Characteristics of Completers vs Lost to Follow-up

**eTable 2.** Summary of Results for Complete Cases Analysis Comparing Changes at 12 Months From Baseline

**eTable 3.** Adverse Events in Early CR and Usual-Care CR

This supplementary material has been provided by the authors to give readers additional information about their work.

**eTable 1.** Demographic and Clinical Characteristics of Completers vs Lost to Follow-up

| Characteristic / Outcome                              | Completed follow up<br>(n=118 <sup>†</sup> ) | Lost to follow up<br>(n=40 <sup>†</sup> ) | p-value             |
|-------------------------------------------------------|----------------------------------------------|-------------------------------------------|---------------------|
| <b>Demographic characteristics</b>                    |                                              |                                           |                     |
| Gender, n (%) Females                                 | 21 (17.80)                                   | 4 (10.00)                                 | 0.243 <sup>‡</sup>  |
| Age (years) at operation<br>Mean (SD)<br>Median (IQR) | 63.33 (11.1)<br>65.50 (58.0-70.0)            | 61.30 (12.8)<br>62.00 (53.8-70.2)         | 0.385 <sup>*</sup>  |
| Body mass index (BMI)<br>Mean (SD)<br>Median (IQR)    | 28.93 (5.15)<br>28.32 (25.40-31.87)          | 29.01 (5.88)<br>27.69 (25.68-31.94)       | 0.887 <sup>*</sup>  |
| Surgery, n (%)<br>Elective<br>Emergency               | 78 (66.1)<br>40 (33.9)                       | 27 (67.5)<br>13 (32.5)                    | 0.871 <sup>‡</sup>  |
| <b>Past medical history</b>                           |                                              |                                           |                     |
| Previous CABG, n (%) Yes                              | 1 (0.8)                                      | 0 (0.0)                                   | 1.000 <sup>**</sup> |
| IHD, n (%) Yes                                        | 29 (24.6)                                    | 9 (22.5)                                  | 0.791 <sup>‡</sup>  |
| Previous MI, n (%) Yes                                | 17 (14.4)                                    | 5 (12.5)                                  | 0.763 <sup>‡</sup>  |
| Other past conditions, n (%) Yes                      | 20 (16.9)                                    | 10 (25.0)                                 | 0.262 <sup>‡</sup>  |
| <b>Current medical status</b>                         |                                              |                                           |                     |
| Hypertension, n (%) Yes                               | 57 (48.3)                                    | 14 (35.0)                                 | 0.144 <sup>‡</sup>  |
| Diabetes, n (%) Yes                                   | 23 (19.5)                                    | 10 (25.0)                                 | 0.459 <sup>‡</sup>  |
| Family history, n (%) Yes                             | 20 (16.9)                                    | 10 (25.0)                                 | 0.262 <sup>‡</sup>  |
| HAD, n (%) Yes                                        | 2 (1.7)                                      | 4 (10.0)                                  | 0.036 <sup>**</sup> |
| Smoking status, n (%)<br>Non-smoker<br>Smoker         | 107 (90.7)<br>11 (9.3)                       | 31 (77.5)<br>9 (22.5)                     | 0.030 <sup>‡</sup>  |
| Hypercholesterolaemia, n (%) Yes                      | 37 (31.4)                                    | 12 (30.0)                                 | 0.873 <sup>‡</sup>  |
| <b>Endpoints' measurements</b>                        |                                              |                                           |                     |
| 6MWT<br>Mean (SD)<br>Median (IQR)                     | 225.9 (131.7)<br>239.5 (90.0-330.0)          | 184.9 (125.6)<br>180.0 (60.0-275.0)       | 0.085 <sup>*</sup>  |

Data as mean (standard deviation, SD) or median (interquartile range, IQR) as appropriate. <sup>†</sup>Number randomised: some endpoints have missing data (number of missing cases are reported in the table). <sup>‡</sup>Chi-squared test; <sup>\*</sup>Mann-Whitney U test; <sup>\*\*</sup>Fisher's exact test; CABG, coronary artery bypass graft; AVR, aortic valve replacement; MVR, mitral valve replacement; IHD, ischaemic heart disease; MI, myocardial infarction; HAD, hospital anxiety and depression score; 6-MWT, six-minute walk test distance.

**eTable 2.** Summary of Results for Complete Cases Analysis Comparing Changes at 12 Months From Baseline

|                    | n   |     | Mean (SD) for usual-care CR |                            | Mean (SD) for early CR |                            | Difference <sup>‡</sup> in changes<br>(early CR – usual-care CR) |
|--------------------|-----|-----|-----------------------------|----------------------------|------------------------|----------------------------|------------------------------------------------------------------|
|                    | UCR | ECR | Baseline                    | 12 months                  | Baseline               | 12 months                  | Mean (95% CI), p-value                                           |
| 6-MWT              | 33  | 26  | 235.3 (156.1)               | 513.1 <sup>†</sup> (104.0) | 224.8 (119.4)          | 500.4 <sup>†</sup> (123.0) | -2.08 (-66.4, 62.2), 0.948                                       |
| 5T-STTS            | 32  | 24  | 19.75 (10.39)               | 9.81 <sup>†</sup> (4.98)   | 19.88 (12.66)          | 9.67 <sup>†</sup> (4.57)   | 0.27 (-5.65, 6.19), 0.926                                        |
| Leg strength (Kg)  | 28  | 25  | 30.76 (12.20)               | 40.14 <sup>†</sup> (12.82) | 32.39 (10.50)          | 42.57 <sup>†</sup> (13.00) | 0.81 (-4.17, 5.79), 0.746                                        |
| Grip strength (Kg) | 31  | 26  | 32.66 (8.30)                | 37.97 <sup>†</sup> (7.94)  | 29.73 (8.62)           | 35.62 <sup>†</sup> (10.25) | 0.57 (-2.27, 3.41), 0.688                                        |
| GAD-7              | 34  | 37  | 5.26 (5.52)                 | 1.35 <sup>†</sup> (2.29)   | 5.54 (5.18)            | 1.68 <sup>†</sup> (3.75)   | -0.05 (-2.67, 2.58), 0.972                                       |
| PHQ-9              | 42  | 41  | 7.40 (4.94)                 | 2.57 <sup>†</sup> (4.09)   | 7.80 (5.50)            | 3.05 <sup>†</sup> (3.89)   | -0.08 (-2.76, 2.60), 0.954                                       |
| SF-12 Physical     | 33  | 32  | 12.30 (3.23)                | 16.91 <sup>†</sup> (1.97)  | 11.97 (3.00)           | 16.91 <sup>†</sup> (2.05)  | 0.33 (-1.36, 2.02), 0.697                                        |
| SF-12 Mental       | 33  | 32  | 19.42 (4.29)                | 22.48 <sup>†</sup> (3.36)  | 18.38 (4.09)           | 23.31 <sup>†</sup> (2.65)  | 1.88 (-0.46, 4.21), 0.114                                        |
| SF-12 Total        | 33  | 32  | 31.73 (6.86)                | 39.45 <sup>†</sup> (4.50)  | 30.66 (6.25)           | 40.22 <sup>†</sup> (3.84)  | 1.84 (-1.79, 5.46), 0.316                                        |

Data as mean (standard deviation, SD) unless otherwise specified. UCR, usual-care CR; ECR, early CR; 6-MWT, six-minute walk test distance; 5T-STTS, five times sit-to-stand test; GAD-7, generalised anxiety disorder questionnaire; PHQ-9, patient health questionnaire; SF-12, short form survey; <sup>†</sup> improvement; <sup>‡</sup> positive and negative differences favour early CR and usual-care CR respectively

**eTable 3.** Adverse Events in Early CR and Usual-Care CR

|            | All events, n (%) <sup>†</sup> |           | p-value <sup>‡</sup> |
|------------|--------------------------------|-----------|----------------------|
|            | Usual-care CR                  | Early CR  |                      |
| <b>SAE</b> |                                |           | 0.374                |
| None       | 67 (83.8)                      | 61 (78.2) |                      |
| One        | 12 (15.0)                      | 16 (20.5) |                      |
| Two        | 1 (1.3)                        | 1 (1.3)   |                      |
| <b>AE</b>  |                                |           | 0.207                |
| None       | 49 (61.3)                      | 41 (51.3) |                      |
| One        | 21 (26.3)                      | 22 (28.2) |                      |
| Two        | 6 (7.5)                        | 13 (16.7) |                      |
| Three      | 3 (3.8)                        | 2 (2.6)   |                      |
| Four       | 1 (1.3)                        | 1 (1.3)   |                      |

SAE = Serious Adverse Event, AE = Adverse Event, <sup>†</sup>n is the number of patients with number of events in column 1 and denominator for % number of patients in a group, <sup>‡</sup>Chi-squared test p-value to assess whether there is association between type of CR and a patient having at least one event.
