# Supplementary material
Source: PubMed Central journal article supplement (PMC9218928)
Supplement: jamacardiol-e221651-s003.pdf [file jamacardiol-e221651-s003.pdf]

Ennis S, Lobley G, Worrall S, et al. Effectiveness and safety of early initiation of poststernotomy cardiac rehabilitation exercise training: the SCAR randomized clinical trial. *JAMA Cardiol*. Published online June 22, 2022. doi:10.1001/jamacardio.2022.1651

### **Data Sharing Statement**

#### **Data**

**Data available:** Yes

**Data types:** Deidentified participant data

**How to access data:** [stuart.ennis@warwick.ac.uk](mailto:stuart.ennis@warwick.ac.uk)

**When available:** beginning date: 09-01-2023

#### **Supporting Documents**

**Document types:** None

#### **Additional Information**

**Who can access the data:** n/a

**Types of analyses:** n/a

**Mechanisms of data availability:** n/a
